# Supplementary material for: Binding of omeprazole to protein targets identified by monoclonal antibodies
Source: PLOS journal article supplement (doi:10.1371/journal.pone.0239464), 2020-09-18
Supplement: S3 (10.1371/journal.pone.0239464.s003) [file journal.pone.0239464.s003]

Figure 1B

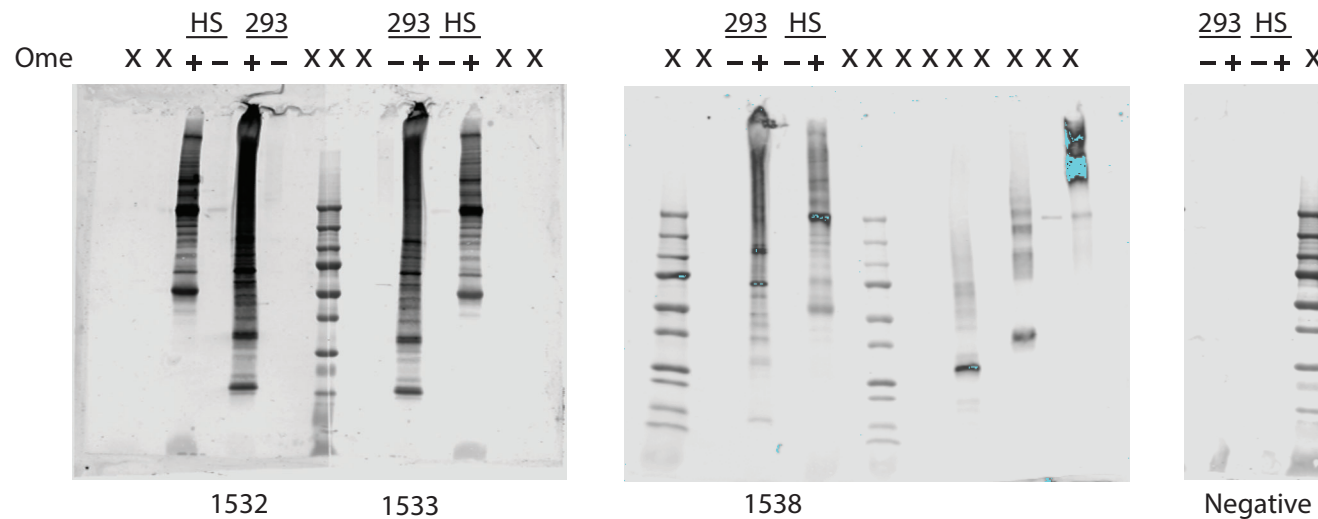

Figure 1C

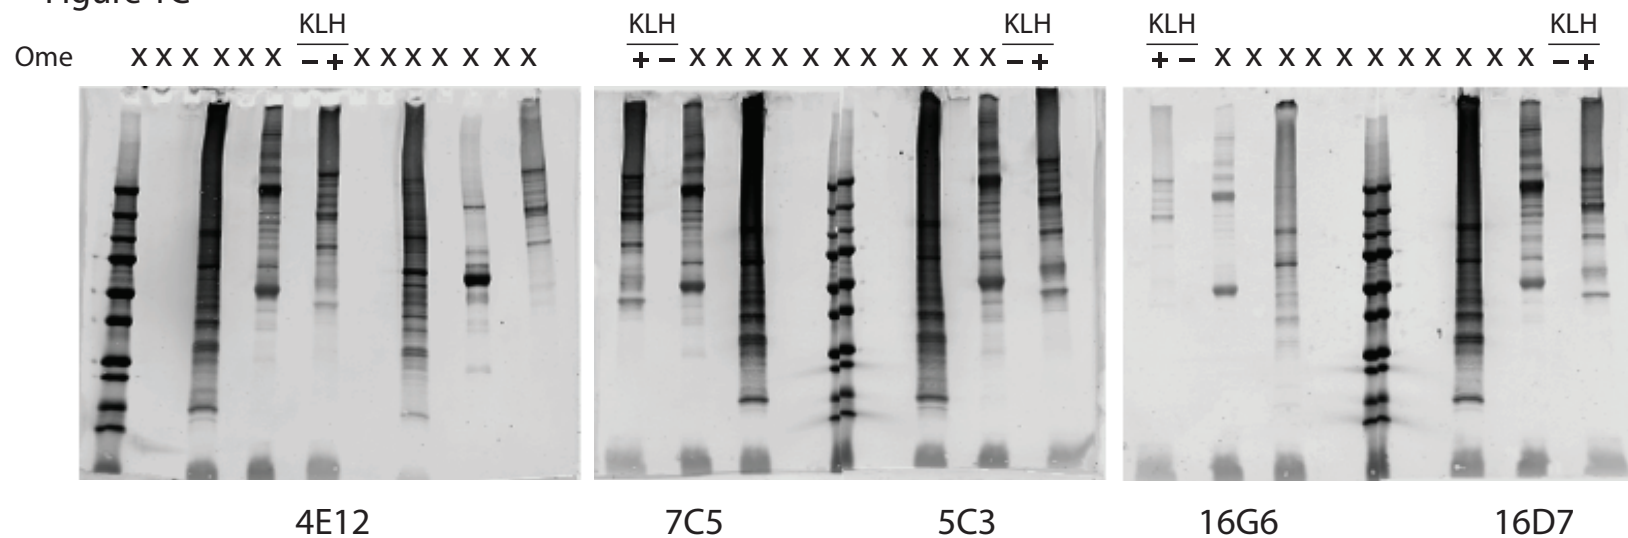

Sample wells were loaded in the indicated manner and Odyssey LICOR imager was used for the image capture.

Ome=Omeprazole

Figure 1B, 293 = HEK 293 cells lysate, HS = Human Serum

Figure 1C, KLH = Keyhole Lympet Hemocyanin

Figure 2A

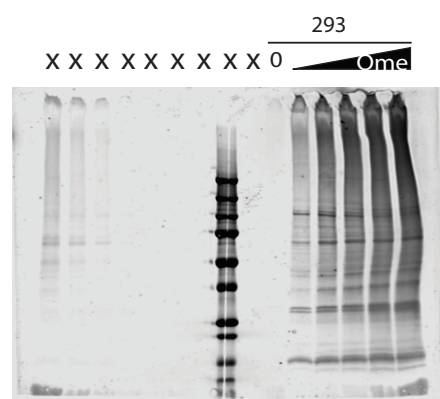

4E12

Figure 2B

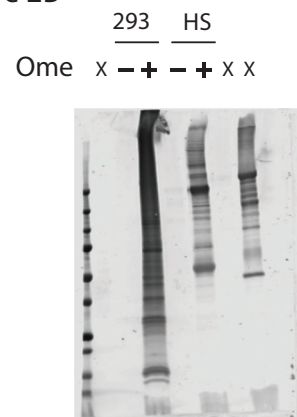

4E12

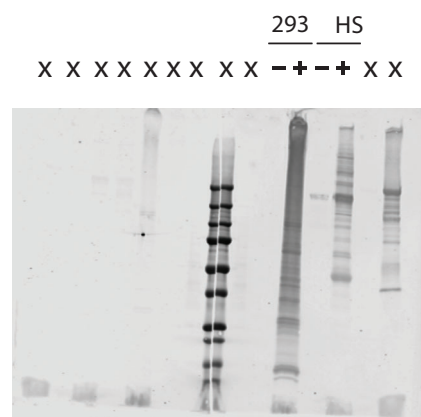

5C3

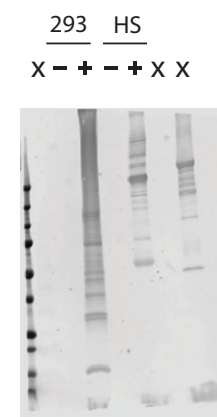

7C5

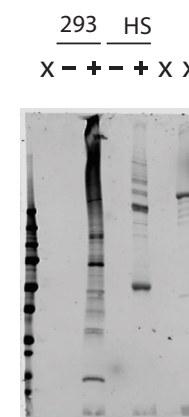

16D7

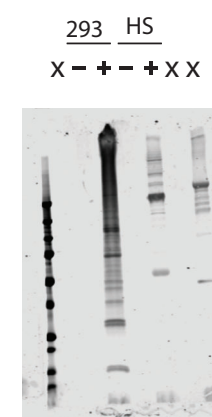

16G6

Sample wells were loaded in the indicated manner and Odyssey LICOR imager was used for the image capture.  
Ome = omeprazole treatment dose in figure 1A, 0, 0.1, 0.25, 0.5, 1, 2mM. 293 = HEK 293 cells lysate,  
Figure 2B, HS = Human Serum  
X = sample not included in the manuscript

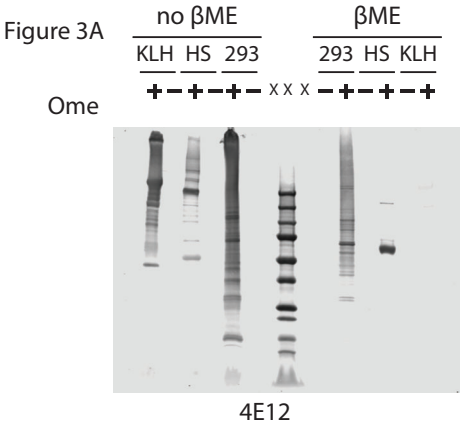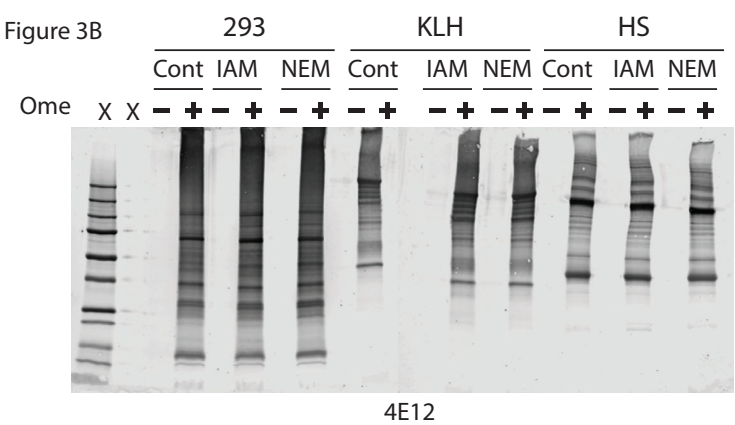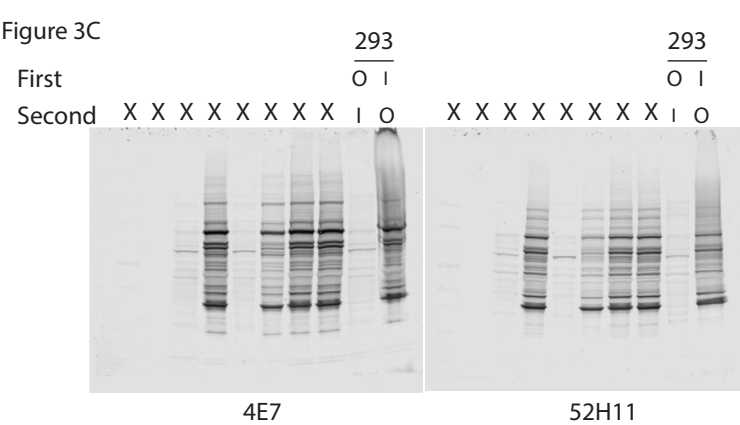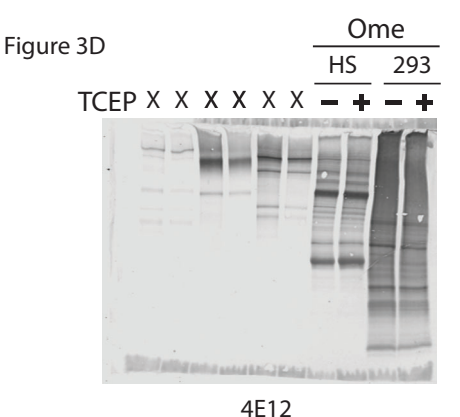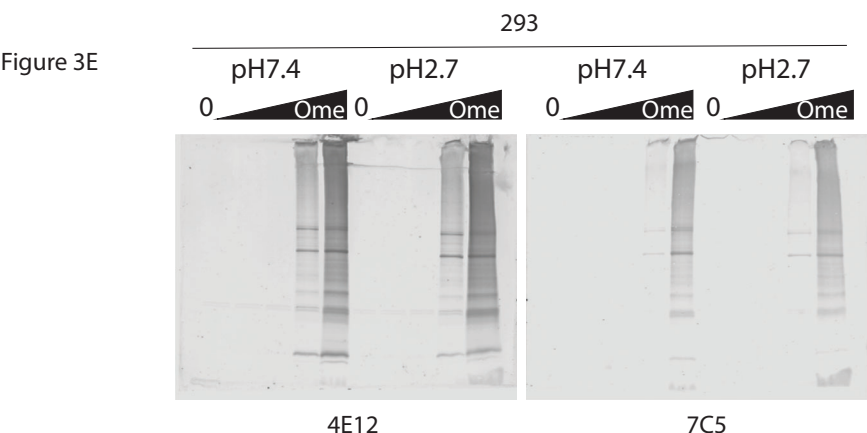

Samples wells were loaded as indicated in the figures above and Odyssey LICOR was used for the image capture.  
 Ome = Omeprazole, 293 = 293 cells lysate, HS = Human Serum, KLH = Keyhole Lympet Hemocyanin, X = samples not included in the manuscript figures  
 Figure 3B, Cont= Control, IAM = Iodoacetamide, NEM = N-ethylmaleimide  
 Figure 3C, I = Iodoacetamide, O = Omeprazole

Figure 4A

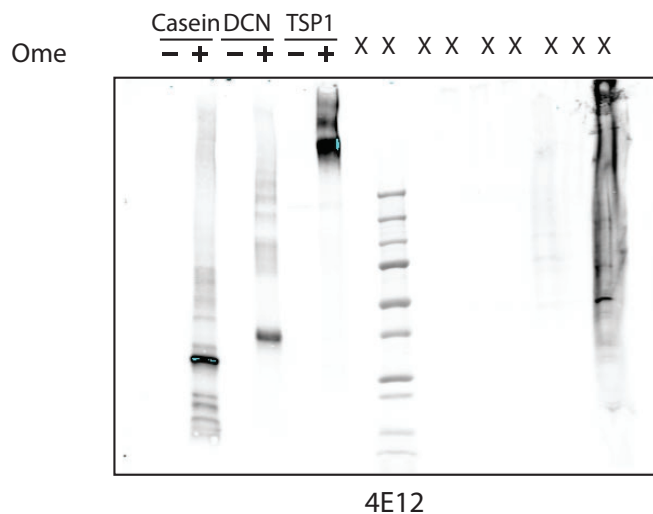

Figure 4B

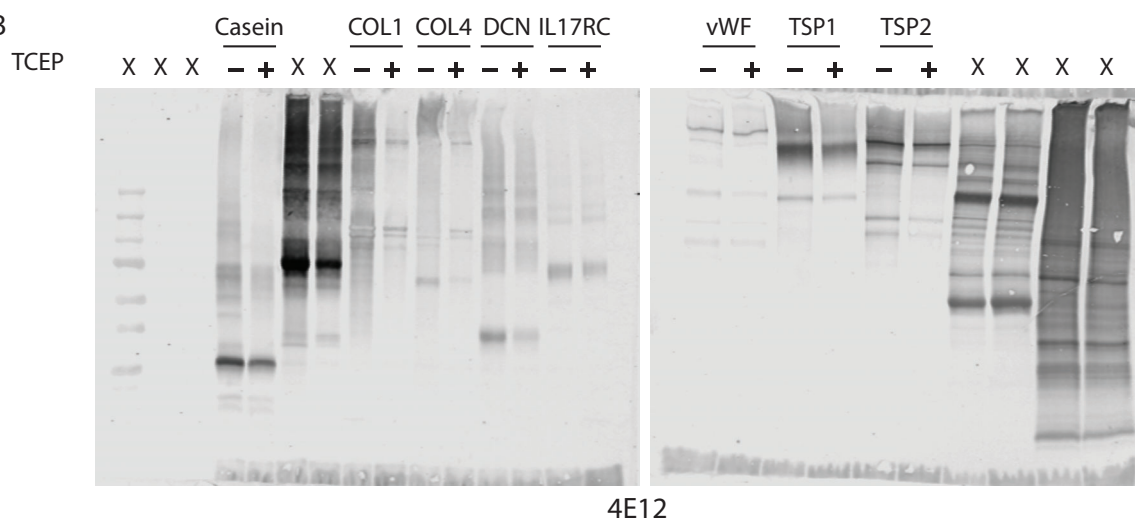

Figure 4C

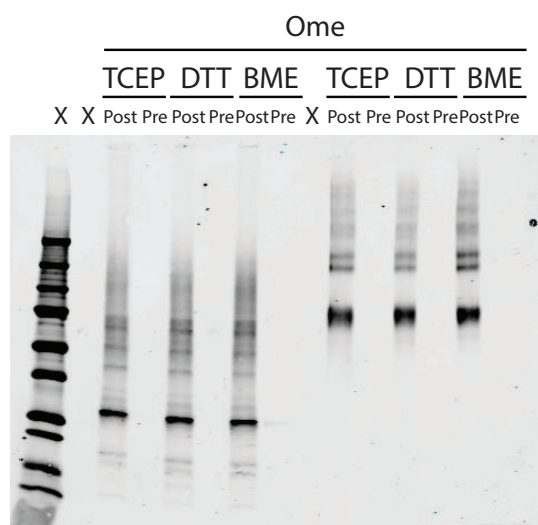

Sample wells loading are as shown in the figures. Odyssey LICOR imager was used for the image capture.

Ome = Omeprazole

X = Sample not included in the manuscript

Figure 5A

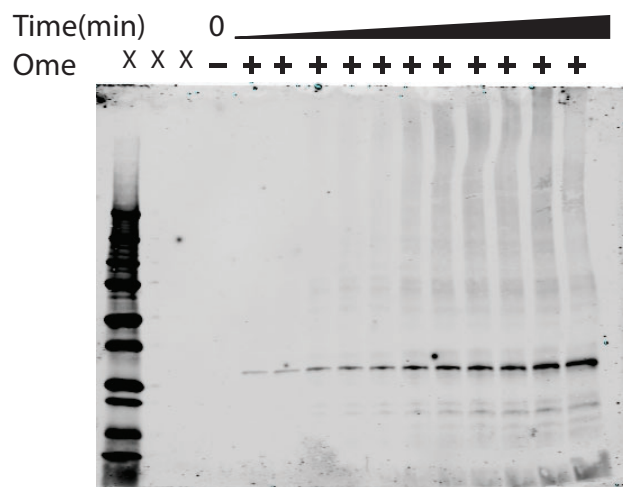

Figure 5B

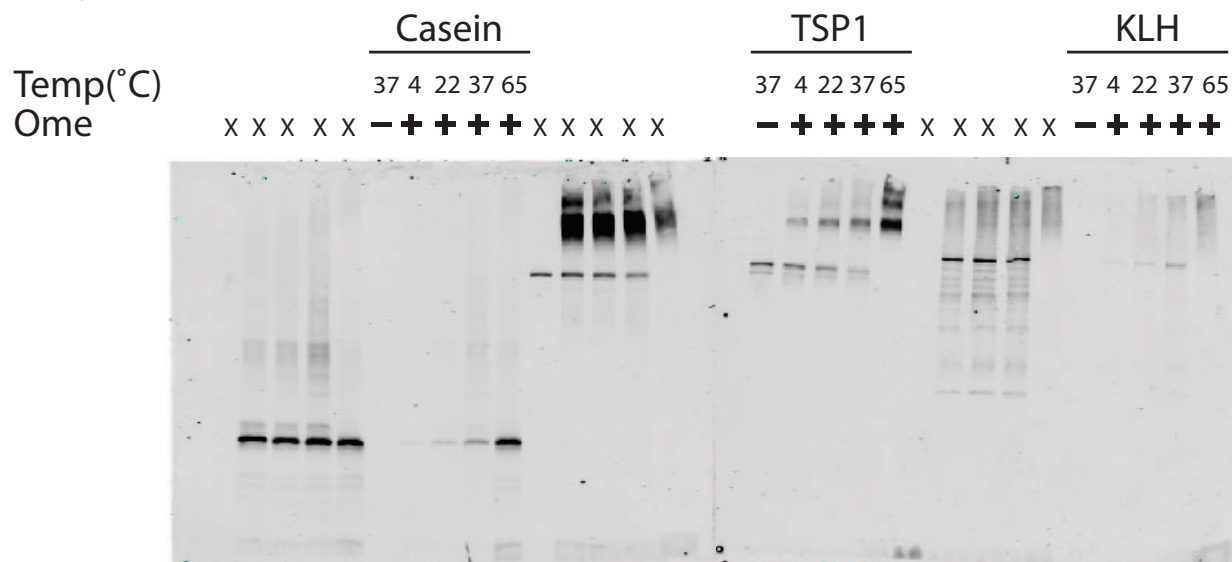

All samples were loaded as indicated and Odyssey LICOR was used for the image capture.  
X = sample not included in the manuscript figures.

Figure 5A

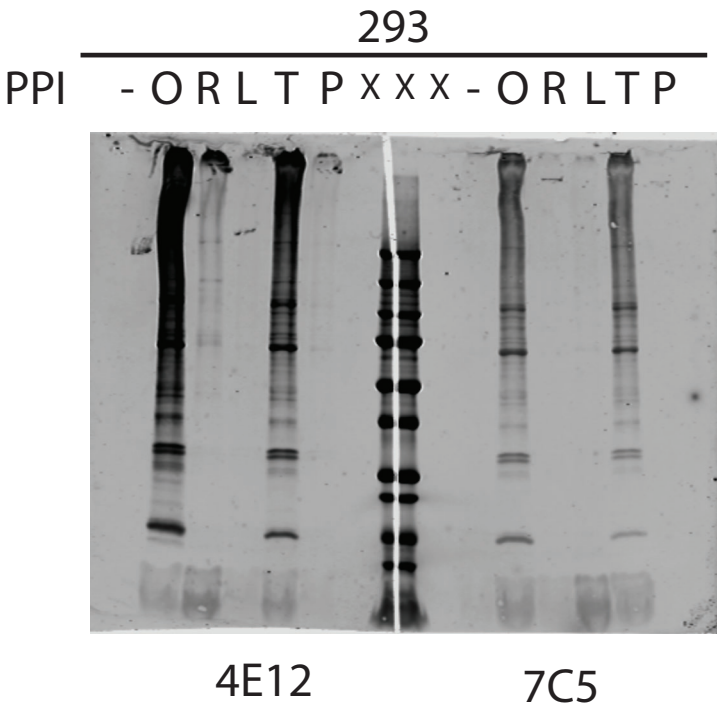

Sample wells were loaded as indicated and Odyssey LICOR imager was used for image capture.

293 = HEK 293 cells lysate

PPI = proton pump inhibitor

O = omeprazole, R = Rabeprazole, L= Lansoprazole, T = Tenatoprazole

P = Pantoprazole

## Supplemental Figure A

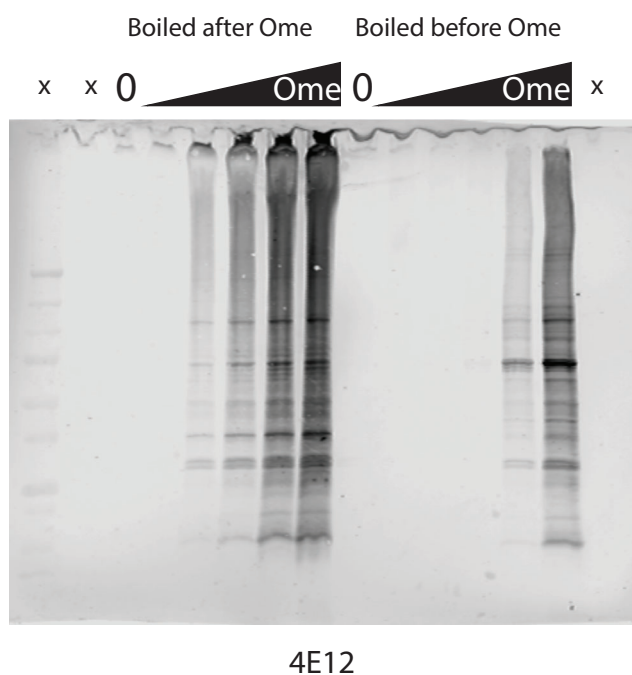

## B

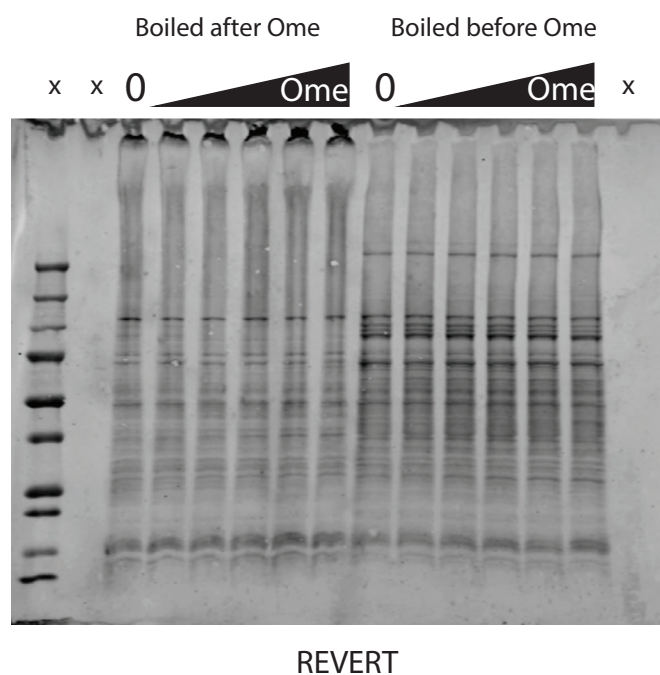

Sample wells were loaded as indicated and Odyssey LICOR imager was used for image capture.

Ome = Omeprazole concentration 1, 10, 25, 50, 100  $\mu$ M.



Supplemental Figure 2

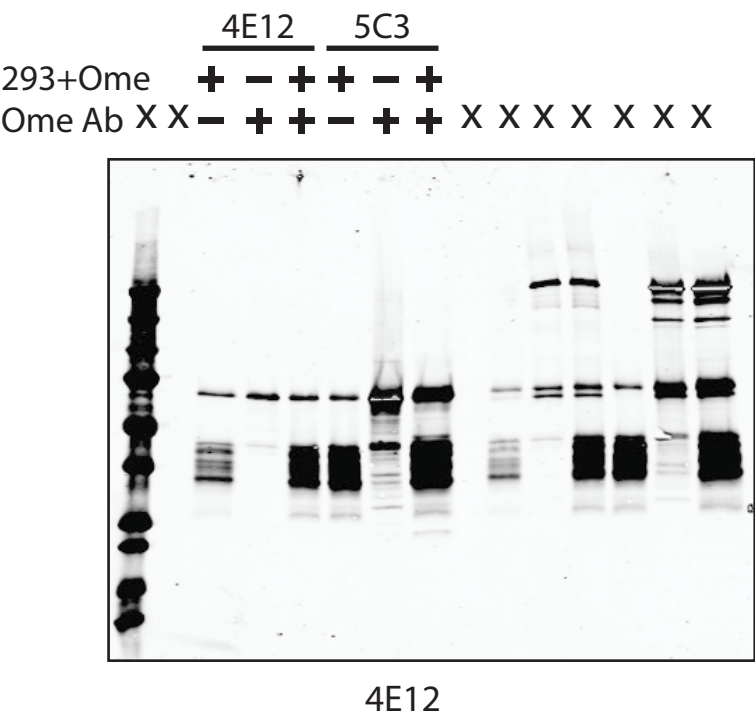

Sample wells were loaded as indicated and Odyssey LICOR imager was used for image capture.

293 = HEK 293 lysates, Ome = Omeprazole,  
Ome Ab = Omeprazole monoclonal antibody  
X = sample not included in the manuscript figure.
